# Supplementary material for: Late Age- and Dose-Related Effects on the Proteome of Thyroid Tissue in Rats after <sup>131</sup>I Exposure
Source: Preprints.org preprint supplement (doi:10.20944/preprints202403.1345.v1), 2024-03-22
Supplement: Supplementary file 1 [file supplementary]

**Supplementary Table 1.** P**roteins that were significantly regulated in only one of the groups (Y50, Y500, A50 or A500) compared to controls.** In total 42, 380, 168 and 168 proteins were identified in the Y50, Y500, A50 and A500 groups respectively fc stands for fold change

| **Y50** | | **Y500** | | | | **A50** | | **A500** | |
| --- | --- | --- | --- | --- | --- | --- | --- | --- | --- |
| **Protein** | **fc** | **Protein** | **fc** | **Protein** | **fc** | **Protein** | **fc** | **Protein** | **fc** |
| LYRM1 | -0.66 | CYP2U1 | -1.8 | SH3GL2 | -0.7 | MYHC | -1.58 | KCNJ16 | -1.55 |
| SIRT3 | -0.66 | ECI3 | -1.68 | PAF1 | -0.7 | RHD | -1.5 | PERM1 | -1.51 |
| PSPH | -0.66 | ADH1 | -1.65 | RAB13 | -0.7 | TANC2 | -1.49 | CAP2 | -1.31 |
| STAU1 | -0.65 | AFMID | -1.6 | DENND5B | -0.7 | PKIA | -1.34 | RPS6KA1 | -1.2 |
| MRPS34 | -0.64 | LOC100911564 | -1.39 | SHISA4 | -0.7 | Uncharacterized protein | -1.29 | AG2 | -1.2 |
| ERI1 | -0.64 | HOGA1 | -1.34 | LOC100912534 | -0.7 | MAP2K2 | -1.26 | Glyceraldehyde-3-phosphate dehydrogenase | -1.16 |
| PJA2 | -0.64 | HSD11B1 | -1.33 | ELMO2 | -0.7 | UBE2D1 | -1.18 | AK9 | -1.12 |
| FBXL20 | -0.64 | BTBD1 | -1.29 | CDK4 | -0.7 | HIF1AN | -1.12 | GPR108 | -1.06 |
| REXO4 | -0.64 | SPCS3 | -1.27 | TDRKH | -0.7 | RPL3L | -1.08 | PRKCQ | -1.01 |
| SNX11 | -0.64 | BLVRA | -1.25 | CHD1 | -0.69 | SMPX | -1.05 | PI16 | -0.96 |
| SCAF8 | -0.63 | Uncharacterized protein | -1.18 | MANBAL | -0.69 | DMTN | -1.02 | MSH2 | -0.93 |
| BCR | -0.63 | PIGN | -1.12 | TACO1 | -0.69 | KNG1 | -1.02 | SLC7A8 | -0.91 |
| ABHD17B | -0.63 | SLC49A4 | -1.12 | ATG5 | -0.69 | PCBP4 | -0.99 | PALLDL1 | -0.91 |
| SLC27A3 | -0.63 | AOX1 | -1.1 | APH1A | -0.69 | LYRM4 | -0.99 | OCLN | -0.9 |
| CEP57 | -0.62 | PIBF1 | -1.1 | CLDND1 | -0.69 | CAMK2G | -0.95 | UTP20 | -0.9 |
| AGPAT4 | -0.62 | HYKK | -1.1 | WASHC1 | -0.69 | KCNIP3 | -0.95 | FBXW8 | -0.89 |
| ARL6 | -0.62 | GSTA1 | -1.08 | ATG2B | -0.69 | STAP2 | -0.95 | VSTM2B | -0.89 |
| TMCO4 | -0.62 | PRR15 | -1.07 | UBE4A | -0.69 | FOXK1 | -0.92 | ATP10B | -0.86 |
| THNSL1 | -0.61 | 44445 | -1.05 | ANAPC2 | -0.69 | MLF1 | -0.92 | FMOD | -0.86 |
| DA1 | -0.61 | PDGFRA | -1.05 | STK17B | -0.69 | HBA1 | -0.92 | BOD1 | -0.86 |
| SESN3 | -0.61 | CNOT11 | -1.04 | MRPS24 | -0.69 | RGD1559909 | -0.9 | EMILIN2 | -0.86 |
| SUDS3 | -0.61 | NOVA2 | -1.04 | CIAO2B | -0.68 | CRYBG1 | -0.89 | ATP11C | -0.86 |
| RGD1308601 | -0.6 | TUT1 | -1.02 | RABIF | -0.68 | ARPP19 | -0.89 | GGNBP2 | -0.85 |
| DUOX1 | -0.6 | SLC7A7 | -1.02 | EIF2B2 | -0.68 | EDC3 | -0.88 | TMCO6 | -0.84 |
| YRDC | -0.59 | IDUA | -1.01 | LDLRAP1 | -0.68 | DMAC2 | -0.87 | FCHSD2 | -0.82 |
| XAF1 | -0.58 | ECI1 | -1 | GORASP1 | -0.68 | DPCD | -0.87 | PSMG3 | -0.82 |
| RNF11L1 | -0.58 | ANGPTL8 | -1 | JAGN1 | -0.68 | PRKCE | -0.87 | LOC100910678 | -0.82 |
| NUDCD2 | -0.58 | PICK1 | -1 | MRPS17 | -0.68 | BAHD1 | -0.87 | THOC6 | -0.81 |
| GCC2 | -0.58 | NRSN1 | -0.99 | TMEM87B | -0.68 | CARS2 | -0.86 | HMGCS2 | -0.81 |
| HBA-A2 | 0.59 | SLC38A7 | -0.99 | ST14 | -0.68 | PITHD1 | -0.86 | OTUD7B | -0.81 |
| EFEMP1 | 0.59 | COX18 | -0.99 | KDM3B | -0.68 | LBP | -0.86 | VASH2 | -0.8 |
| ANKS1A | 0.59 | NADK2 | -0.98 | TMEM179B | -0.68 | GOLM1 | -0.84 | SMIM13 | -0.8 |
| WFDC2 | 0.6 | MTHFSD | -0.97 | NEO1 | -0.67 | PTCD2 | -0.84 | TBL3 | -0.79 |
| B2M | 0.6 | TRIM65 | -0.97 | PRPF4B | -0.67 | OS9 | -0.84 | LOC691143 | -0.79 |
| Hemoglobin subunit beta-2 | 0.6 | PIGR | -0.96 | VCPIP1 | -0.67 | KRT17 | -0.83 | RPAP1 | -0.79 |
| PRPF40B | 0.61 | FDFT1 | -0.96 | EPB41L4B | -0.67 | NUDT12 | -0.82 | ANKRD2 | -0.78 |
| GNL3L | 0.61 | ACOX3 | -0.96 | WIPI2 | -0.67 | RIN2 | -0.81 | EPB41L5 | -0.78 |
| LRPPRC | 0.61 | SFTPD | -0.95 | GPR107 | -0.67 | PHACTR2 | -0.81 | DCAF11 | -0.78 |
| TUBB4B | 0.63 | PDE4DIP | -0.95 | CRYZL1 | -0.67 | OGFR | -0.81 | EXTL3 | -0.77 |
| AIF1L | 0.65 | PRX | -0.95 | GIGYF2 | -0.67 | MAP4K5 | -0.8 | UNK | -0.77 |
| FRYL | 0.66 | MEST | -0.94 | DDX55 | -0.67 | HECTD3 | -0.8 | OGFOD3 | -0.77 |
| Ig gamma-2C chain C region | 0.66 | CTNND2 | -0.94 | TUBGCP4 | -0.67 | PLXNB1 | -0.79 | TRIP4 | -0.77 |
|  |  | LPGAT1 | -0.94 | TMEM102 | -0.66 | CPNE2 | -0.79 | INSR | -0.76 |
|  |  | LYRM2 | -0.93 | GNB4 | -0.66 | GLND1 | -0.79 | LSR | -0.76 |
|  |  | PCCA | -0.92 | EIF2B1 | -0.66 | MAD2L1BP | -0.79 | DNAJC16 | -0.76 |
|  |  | ARVCF | -0.92 | BID | -0.66 | TUSC3 | -0.78 | VCAN | -0.76 |
|  |  | LMBRD1 | -0.92 | CWC27 | -0.66 | TERF2IP | -0.78 | ENDOG | -0.76 |
|  |  | ALG14 | -0.91 | SPOCK2 | -0.66 | RIPK1 | -0.77 | POLR2C | -0.75 |
|  |  | TFEB | -0.91 | RNPS1 | -0.66 | OSMR | -0.76 | FNTB | -0.75 |
|  |  | DERL1 | -0.91 | GLRX | -0.66 | MTMR12 | -0.75 | ARHGEF5 | -0.74 |
|  |  | ITPRID2 | -0.91 | RAB43 | -0.66 | AP1S2 | -0.75 | GFRA3 | -0.74 |
|  |  | Uncharacterized protein | -0.9 | PCTP | -0.66 | NMI | -0.74 | CEP131 | -0.74 |
|  |  | MGC108823 | -0.9 | IRF2BP1 | -0.66 | SH2B1 | -0.74 | KLHL29 | -0.74 |
|  |  | SHPK | -0.9 | NOM1 | -0.66 | LPIN1 | -0.73 | XIRP2 | -0.74 |
|  |  | PPP1CC | -0.9 | MAP4K4 | -0.66 | REEP1 | -0.73 | CMTR1 | -0.74 |
|  |  | Guanylyl cyclase alpha 1 subunit | -0.9 | RPL30L1 | -0.66 | BRD1 | -0.73 | OXA1L | -0.74 |
|  |  | PDCL | -0.9 | TAF15 | -0.66 | POLD3 | -0.73 | MYO9B | -0.73 |
|  |  | NEWGENE_1586233 | -0.9 | IFT20 | -0.65 | ADNP | -0.72 | RCC1L | -0.73 |
|  |  | ATP9B | -0.9 | PLXDC2 | -0.65 | RHOB | -0.71 | DNAJB14 | -0.73 |
|  |  | GHITM | -0.9 | SEC11C | -0.65 | Uncharacterized protein | -0.71 | PLP1 | -0.73 |
|  |  | GFAP | -0.89 | CNPY1 | -0.65 | JAK2 | -0.7 | Uncharacterized protein (Fragment) | -0.73 |
|  |  | LAMA1 | -0.89 | RCN3 | -0.65 | KIDINS220 | -0.7 | MSRB3 | -0.72 |
|  |  | BCL2L11 | -0.89 | F8A1 | -0.65 | Uncharacterized protein | -0.69 | SLC5A5 | -0.72 |
|  |  | FIG4 | -0.89 | NDUFC1 | -0.65 | MPZL1 | -0.69 | MYH7 | -0.72 |
|  |  | RALGAPA2 | -0.88 | GALT | -0.65 | WNT4 | -0.69 | NEWGENE_1582994 | -0.72 |
|  |  | NEMP1 | -0.88 | PARP9 | -0.65 | POLB | -0.69 | TACC1 | -0.72 |
|  |  | JCAD | -0.88 | NPDC1 | -0.65 | ITGB2 | -0.69 | RGD1565323 | -0.72 |
|  |  | AKAP17A | -0.87 | PPP1R8 | -0.65 | EBPL | -0.69 | GALNT16 | -0.71 |
|  |  | SLC15A4 | -0.86 | NUP85 | -0.65 | XXYLT1 | -0.69 | MCM2 | -0.71 |
|  |  | TM7SF3 | -0.86 | MINDY3 | -0.65 | IRF3 | -0.69 | ADGRE5 | -0.71 |
|  |  | MED22 | -0.86 | COL4A3 | -0.65 | DARS2 | -0.68 | ZFYVE1 | -0.71 |
|  |  | PIGK | -0.86 | CDH11 | -0.65 | Uncharacterized protein | -0.68 | COL1A1 | -0.71 |
|  |  | LOC691170 | -0.86 | WDR6 | -0.65 | NOL11 | -0.67 | PARD3 | -0.71 |
|  |  | PDLIM2 | -0.85 | Uncharacterized protein | -0.65 | SYTL1 | -0.67 | DNAJB9 | -0.71 |
|  |  | NPHP3 | -0.85 | BOD1L1 | -0.65 | EXOSC3 | -0.67 | MVB12A | -0.71 |
|  |  | ANAPC1 | -0.84 | DAXX | -0.64 | Dermcidin | -0.66 | RPS29 | -0.71 |
|  |  | HACD2 | -0.84 | C1S | -0.64 | TRIP6 | -0.66 | PROB1 | -0.7 |
|  |  | NEBL | -0.84 | FOXP1 | -0.64 | MEIS1 | -0.66 | FAR1 | -0.7 |
|  |  | ASCC3 | -0.84 | WNK2 | -0.64 | RTN2 | -0.65 | BRAT1 | -0.69 |
|  |  | NQO2 | -0.84 | MRPL40 | -0.64 | PSMG1 | -0.65 | RIPOR1 | -0.69 |
|  |  | PPIP5K2 | -0.84 | HMGN2 | -0.64 | CTSS | -0.64 | ZMYM3 | -0.69 |
|  |  | HOOK2 | -0.84 | SNRNP35 | -0.64 | Uncharacterized protein | -0.64 | MYL2 | -0.68 |
|  |  | 2 | -0.84 | RPRD2 | -0.64 | CEACAM1 | -0.64 | RGN | -0.68 |
|  |  | ADAMTSL4 | -0.84 | PHYH | -0.64 | DHX58 | -0.64 | OTUD6B | -0.68 |
|  |  | TEX264 | -0.83 | SRC | -0.64 | MBP | -0.64 | MED12 | -0.68 |
|  |  | MAP7 | -0.83 | GIGYF2 | -0.64 | Uncharacterized protein KIAA0930 homolog | -0.64 | CASQ2 | -0.68 |
|  |  | SLC39A10 | -0.82 | PCK1 | -0.64 | ENPP5 | -0.63 | FMNL3 | -0.68 |
|  |  | PLEKHA5 | -0.82 | TPMT | -0.64 | PLSCR4 | -0.63 | UBTD1 | -0.67 |
|  |  | CRLS1 | -0.82 | PECR | -0.64 | ARHGAP10 | -0.63 | RRP12 | -0.67 |
|  |  | SARAF | -0.82 | VPS33A | -0.64 | IGH-6 | -0.63 | AIDA | -0.67 |
|  |  | EXD2 | -0.81 | TMEM107 | -0.64 | IFT81 | -0.62 | TNC | -0.67 |
|  |  | TAF6 | -0.81 | NR3C1 | -0.64 | RGD1310429 | -0.62 | LRRC58 | -0.67 |
|  |  | TPM1 | -0.81 | RYBP | -0.64 | CHMP1B | -0.62 | NAA25 | -0.67 |
|  |  | PARL | -0.81 | FAH | -0.64 | JTB | -0.61 | SNX4 | -0.67 |
|  |  | TADA3 | -0.8 | MFAP1A | -0.63 | MAP1LC3A | -0.61 | SESTD1 | -0.67 |
|  |  | HAX1 | -0.8 | CNPY4 | -0.63 | TXLNG | -0.61 | MRC2 | -0.66 |
|  |  | CD300LG | -0.8 | PIGW | -0.63 | PLEK | -0.61 | GXYLT1 | -0.66 |
|  |  | SLC39A11 | -0.8 | DHX57 | -0.63 | NTPCR | -0.6 | LDAH | -0.66 |
|  |  | MMAB | -0.8 | POM121 | -0.63 | SLC43A1 | -0.6 | ATXN3 | -0.66 |
|  |  | OLR1515 | -0.79 | RAP2A | -0.63 | TUBGCP3 | -0.6 | SMNDC1 | -0.66 |
|  |  | LOXL1 | -0.79 | GNA11 | -0.63 | EIF4EBP1 | -0.6 | CSMD2 | -0.66 |
|  |  | TXNDC15 | -0.79 | USP48 | -0.63 | NCK2 | -0.59 | MAP2K1 | -0.66 |
|  |  | RPP38 | -0.79 | FERMT1 | -0.63 | GLMP | -0.59 | SLC43A2 | -0.66 |
|  |  | SLC25A42 | -0.79 | PDE5A1 | -0.63 | SPINT2 | -0.59 | MRPL13 | -0.66 |
|  |  | PDP2 | -0.79 | RABL3 | -0.63 | BASP1 | -0.59 | SYNC | -0.66 |
|  |  | RGD1565166 | -0.78 | ZFP787 | -0.63 | PLCD3 | -0.59 | LSM6 | -0.65 |
|  |  | STXBP4 | -0.78 | TCP11L1 | -0.63 | RAB3IP | -0.59 | CAMK1 | -0.65 |
|  |  | GNAI1 | -0.78 | ROR2 | -0.63 | NUP62 | -0.59 | SYNGR3 | -0.65 |
|  |  | SMARCB1 | -0.78 | ATP6V1G1 | -0.63 | CD93 | -0.59 | RSRP1 | -0.65 |
|  |  | SEMA4D | -0.78 | EIF3M | -0.63 | PTPRJ | -0.59 | SIRPA | -0.64 |
|  |  | MCRS1 | -0.78 | YIPF6 | -0.62 | RRP15 | -0.59 | DOK1 | -0.64 |
|  |  | BIN2 | -0.78 | RABL6 | -0.62 | TBC1D20 | -0.58 | TBC1D2 | -0.63 |
|  |  | DNAJC9 | -0.78 | ZER1 | -0.62 | CBL | -0.58 | MAN2A2 | -0.63 |
|  |  | KDF1 | -0.78 | TAF10 | -0.62 | IGHMBP2 | -0.58 | RGD1308350 | -0.63 |
|  |  | UBE2L6 | -0.77 | BMS1 | -0.62 | S100A1 | -0.58 | ATP5F1E | -0.63 |
|  |  | EHHADH | -0.77 | RAB8B | -0.62 | SF3B4 | 0.58 | FN3K | -0.63 |
|  |  | TMEM115 | -0.77 | SNX16 | -0.62 | Bcl-2-interacting death suppressor | 0.58 | ATM | -0.63 |
|  |  | CMTM3 | -0.77 | DDX56 | -0.62 | RALB | 0.59 | RING1 | -0.63 |
|  |  | BLES03 | -0.77 | GTF3C2 | -0.62 | MB | 0.59 | CPB2 | -0.63 |
|  |  | RGD1308428 | -0.77 | GABPB1L | -0.62 | MYOT | 0.59 | ATRAID | -0.63 |
|  |  | HM13 | -0.77 | ASPSCR1 | -0.62 | ATP2A1 | 0.6 | TTC19 | -0.63 |
|  |  | MYCT1 | -0.77 | AKR1C9 | -0.62 | ALPK3 | 0.6 | EXOSC9 | -0.62 |
|  |  | HRCT1 | -0.77 | DHRS1 | -0.62 | MPP2 | 0.6 | RGD1308134 | -0.62 |
|  |  | PEX6 | -0.77 | PRMT9 | -0.62 | JPH1 | 0.6 | ERCC3 | -0.62 |
|  |  | POLR2D | -0.76 | UBE2D2 | -0.61 | SMYD1 | 0.61 | MAP2K4 | -0.62 |
|  |  | NIPBL | -0.76 | OXLD1 | -0.61 | METAP1 | 0.61 | UBE2I | -0.62 |
|  |  | TIMM8A | -0.76 | SMAD1 | -0.61 | CRYBA2 | 0.61 | COL5A2 | -0.61 |
|  |  | STX6 | -0.76 | NF1X | -0.61 | MYL1 | 0.61 | SSPN | -0.61 |
|  |  | NAT8L | -0.76 | FAM98A | -0.61 | MYPN | 0.62 | ABCC3 | -0.61 |
|  |  | SLCO3A1 | -0.76 | ARHGEF37 | -0.61 | RNF213 | 0.63 | DHRSX | -0.6 |
|  |  | LBH | -0.76 | TSC22D1 | -0.61 | TNNI1 | 0.63 | TERF1 | -0.6 |
|  |  | CALCA | -0.76 | P3H3 | -0.61 | SIRT5 | 0.64 | CREG1 | -0.6 |
|  |  | HMGA1 | -0.75 | MARK3 | -0.61 | DUT | 0.64 | YIPF4 | -0.6 |
|  |  | DPY19L1 | -0.75 | ZMIZ1 | -0.61 | RAN | 0.64 | BRK1 | -0.6 |
|  |  | DTNB | -0.75 | BCL2L1 | -0.6 | Cardiac titin N2BA isoform (Fragment) | 0.64 | TRIQK | -0.6 |
|  |  | HMGCS1 | -0.75 | ANAPC5 | -0.6 | MPV17 | 0.65 | EVI5L | -0.6 |
|  |  | TAF6L | -0.75 | SREK1 | -0.6 | TOM1L1 | 0.66 | NOP16 | -0.6 |
|  |  | SEC14L3 | -0.75 | E2F4 | -0.6 | XRN1 | 0.66 | PPFIA1 | -0.59 |
|  |  | GALNT5 | -0.74 | OSBPL11 | -0.6 | ACTA1 | 0.66 | ACP5 | -0.59 |
|  |  | RPS6KA4 | -0.74 | MINDY1 | -0.6 | MYOZ3 | 0.66 | SEC14L2 | -0.59 |
|  |  | ATG16L1 | -0.74 | GRIFIN | -0.6 | SMTNL2 | 0.67 | EFNA4 | -0.59 |
|  |  | IL18 | -0.74 | MADD | -0.6 | LOC100912599 | 0.67 | CD38 | -0.59 |
|  |  | BLOC1S2 | -0.74 | ASPH | -0.6 | SUPT16H | 0.67 | HPS4 | -0.59 |
|  |  | FAS | -0.74 | COG2 | -0.6 | DUPD1 | 0.69 | ARL2 | -0.59 |
|  |  | NUDT1 | -0.74 | PDE5A | -0.6 | ADSSL1 | 0.7 | VKORC1 | -0.58 |
|  |  | ARL2BP | -0.74 | PPOX | -0.59 | CYB561 | 0.7 | RAP1GAP2 | -0.58 |
|  |  | QRICH1 | -0.74 | TMC4 | -0.59 | SLC9A6 | 0.7 | FBXO3 | 0.58 |
|  |  | ABCF3 | -0.74 | FAM174B | -0.59 | FBP2 | 0.72 | SULT5A1 | 0.58 |
|  |  | ELOVL1 | -0.74 | MRPL9 | -0.59 | Uncharacterized protein | 0.72 | FGG | 0.58 |
|  |  | MAPK8IP1 | -0.74 | JADE2 | -0.59 | MYBPC1 | 0.74 | SFTPA1 | 0.58 |
|  |  | CPNE7 | -0.74 | BLOC1S1 | -0.59 | CCDC88C | 0.74 | CPE | 0.59 |
|  |  | OTULIN | -0.74 | TGFBR3 | -0.59 | NAT1 | 0.75 | FGB | 0.59 |
|  |  | METTL15 | -0.74 | PEAK1 | -0.59 | TRDN | 0.75 | CADPS2 | 0.61 |
|  |  | UQCC2 | -0.74 | WDR33 | -0.59 | AKR1B8 | 0.8 | CDKN2AIP | 0.63 |
|  |  | DDAH1 | -0.73 | PCBD1 | -0.59 | SH3BGRL3 | 0.81 | GCH1 | 0.63 |
|  |  | FOXE1 | -0.73 | CTDNEP1 | -0.59 | HSPB6 | 0.81 | C4BPA | 0.64 |
|  |  | ARMH3 | -0.73 | RNF170 | -0.59 | LOC103694902 | 0.82 | CBR4 | 0.69 |
|  |  | PLP2 | -0.73 | PLTP | -0.59 | LOC100361087 | 0.83 | P3H1 | 0.7 |
|  |  | NUP50 | -0.73 | PRSS8 | -0.59 | SLC25A46 | 0.84 | SRSF4 | 0.7 |
|  |  | CHCHD4 | -0.73 | NDUFAF7 | -0.58 | PPP1R1A | 0.85 | PTGDS | 0.75 |
|  |  | MCF2L | -0.73 | MRPL30 | -0.58 | WDFY2 | 0.85 | TIE1 | 0.76 |
|  |  | ACE2 | -0.73 | COMMD6 | -0.58 | GLRX5 | 0.95 | CPT2 | 0.81 |
|  |  | CAPN7 | -0.73 | CLSTN1 | -0.58 | SMPD1 | 0.98 | S100A9 | 0.86 |
|  |  | UPRT | -0.73 | CAVIN4 | 0.58 | KDSR | 1.01 | ORM1 | 1.01 |
|  |  | PNISR | -0.72 | RBKS | 0.6 | ASPH | 1.02 | PRKAG3 | 1.06 |
|  |  | PPIE | -0.72 | HDAC3 | 0.6 | HSPB3 | 1.02 | KNG2 | 1.24 |
|  |  | DAPK2 | -0.72 | BIN1 | 0.6 | BAG5 | 1.15 | MYO18B | 1.53 |
|  |  | POGLUT1 | -0.72 | HSPB8 | 0.6 | MRPL39 | 1.18 | KNG1 | 1.72 |
|  |  | SEC14L1 | -0.72 | ENO3 | 0.61 |  |  |  |  |
|  |  | TRIM36 | -0.72 | ARMT1 | 0.62 |  |  |  |  |
|  |  | MON1A | -0.72 | HRC | 0.62 |  |  |  |  |
|  |  | CMTM7 | -0.72 | VHL | 0.63 |  |  |  |  |
|  |  | BBS4 | -0.72 | CILP | 0.66 |  |  |  |  |
|  |  | ESRP2 | -0.72 | MCM3AP | 0.66 |  |  |  |  |
|  |  | SPRYD4 | -0.72 | PHKG1 | 0.68 |  |  |  |  |
|  |  | COPZ2 | -0.71 | BLVRA | 0.73 |  |  |  |  |
|  |  | ZFP36L1 | -0.71 | MYH3 | 0.74 |  |  |  |  |
|  |  | ACTR5 | -0.71 | ALDH3A1 | 0.75 |  |  |  |  |
|  |  | CCDC88B | -0.71 | CNN1 | 0.77 |  |  |  |  |
|  |  | MYO19 | -0.71 | A1I3 | 0.91 |  |  |  |  |
|  |  | TRPV4 | -0.71 | TNNT3 | 0.91 |  |  |  |  |
|  |  | GAS1 | -0.71 | KRT5 | 0.94 |  |  |  |  |
|  |  | HECTD4 | -0.71 | SFN | 0.97 |  |  |  |  |
|  |  | PRRC2B | -0.7 | DSG1 | 1.07 |  |  |  |  |
|  |  | RARS2 | -0.7 | MHC class I RT1.Aw3 protein | 1.13 |  |  |  |  |
|  |  | LOC103690070 | -0.7 | SERPINB5 | 1.31 |  |  |  |  |
|  |  | FAM126A | -0.7 | ADA | 1.56 |  |  |  |  |
|  |  | YIF1B | -0.7 | HRNR | 1.7 |  |  |  |  |
|  |  | ELOA | -0.7 | MYH8 | 3.12 |  |  |  |  |
|  |  | Uncharacterized protein | -0.7 | RPTN | 4.27 |  |  |  |  |
